# Supplementary material for: Capecitabine monotherapy as first-line treatment in advanced HER2-normal breast cancer – a nationwide, retrospective study
Source: PubMed Central journal article supplement (PMC11332473; doi:10.2340/1651-226x.2024.38886), 2024-06-23
Supplement: AO-63-38886-s1.pdf [file AO-63-38886-s1.pdf]

Supplementary material has been published as submitted. It has not been copyedited, or typeset by Acta Oncologica

**Supplementary Table 1:** Median progression free and overall survival stratified by metastatic sites.

| <b>Group</b>           | <b>Median PFS</b>              | <b>p-value<sup>1</sup></b> | <b>Median OS</b>                  | <b>p-value<sup>1</sup></b> |
|------------------------|--------------------------------|----------------------------|-----------------------------------|----------------------------|
| <b>Metastatic site</b> |                                |                            |                                   |                            |
| Non-visceral           | 6.9 months (95% CI, 6.1 – 8.9) | <0.001                     | 20.1 months (95% CI, 18.2 – 25.6) | <0.001                     |
| Visceral               | 5.3 months (95% CI, 4.2 – 6.5) |                            | 13.0 months (95% CI, 10.3 – 16.1) |                            |

<sup>1</sup>Log-rank test
